# Supplementary material for: Facile fabrication of a polyvinyl alcohol-based hydrophobic fluorescent film via the Hantzsch reaction for broadband UV protection
Source: Royal Society of Chemistry journal article supplement (doi:10.1039/d1mh01783g), 2021-11-23
Supplement: d1mh01783g1.pdf [file d1mh01783g1.pdf]

## Supporting Information

### **Facile fabrication of polyvinyl alcohol-based hydrophobic, fluorescent film via Hantzsch reaction for broadband UV protection**

Hongchen Liu,<sup>\*ab</sup> Hongying Yang,<sup>a</sup> Kunkun Zhu,<sup>\*c</sup> Fang Peng,<sup>b</sup> Lei Guo<sup>b</sup> and  
Haisong Qi<sup>\*b</sup>

<sup>a</sup> College of Textiles, Zhongyuan University of Technology, Zhengzhou 450007, China

<sup>b</sup> State Key Laboratory of Pulp and Paper Engineering, South China University of  
Technology, Guangzhou 510641, China

<sup>c</sup> State Key Laboratory of New Textile Materials and Advanced Processing  
Technologies, Wuhan Textile University, Wuhan 430200, China

\*Corresponding Author, E-mail: liuhongchen.beyond@163.com

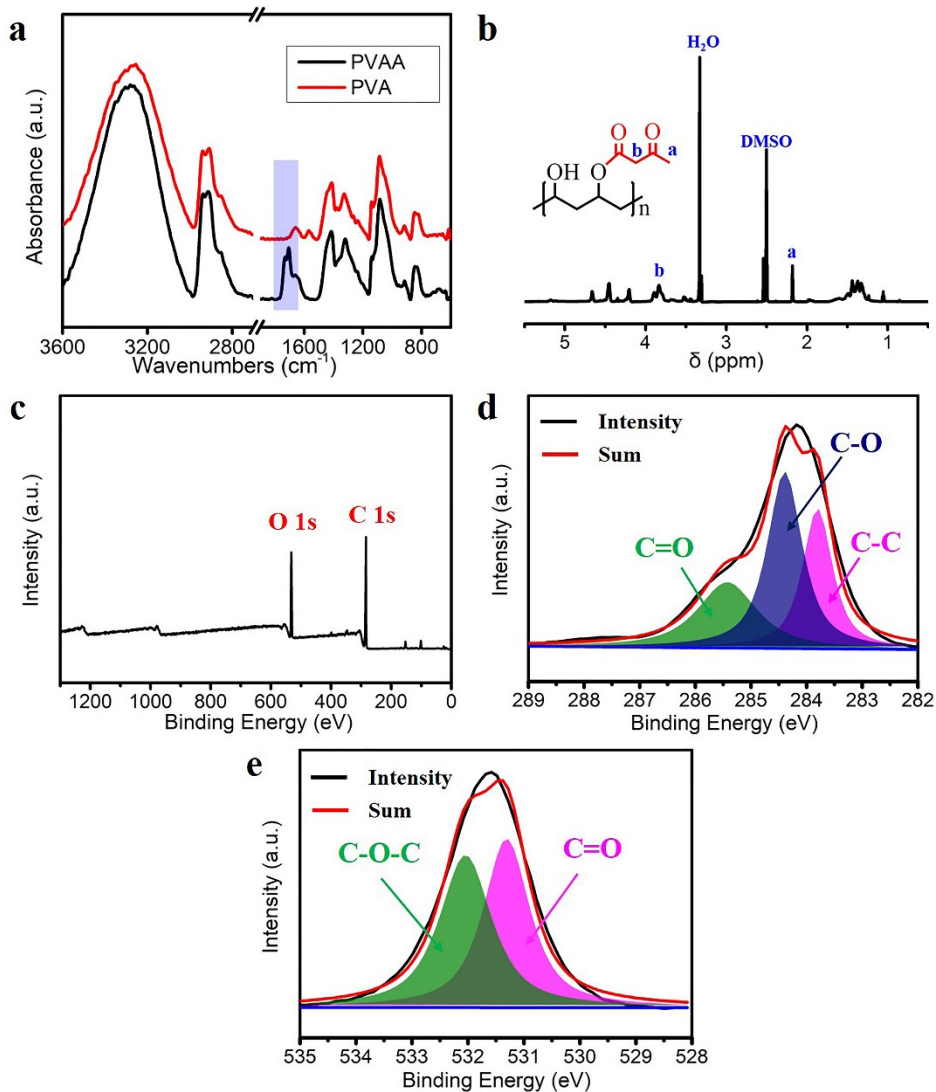

**Fig. S1** (a) FT-IR spectra of PVA, PVAA, and fluorescent film, (b)  $^1\text{H}$  NMR spectra of PVAA in  $\text{DMSO-}d_6$ , (c) XPS wide-scan spectra of PVAA film, (d) high-resolution  $\text{C}1\text{s}$  spectra of PVAA, (e) and high-resolution  $\text{O}1\text{s}$  spectra of PVAA.

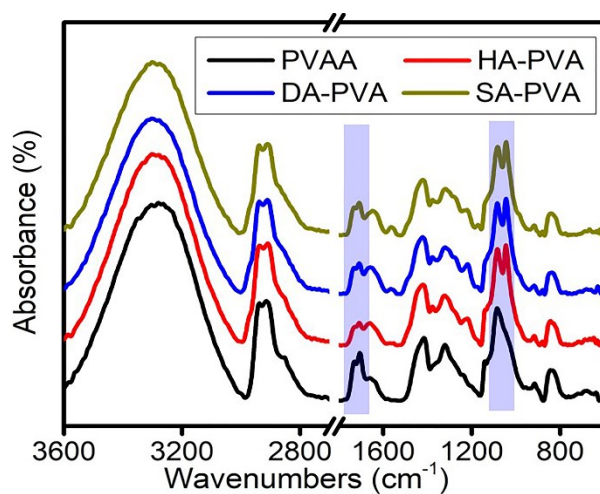

**Fig. S2** FT-IR spectra of PVAA and HA-PVA, DA-PVA, and SA-PVA films.

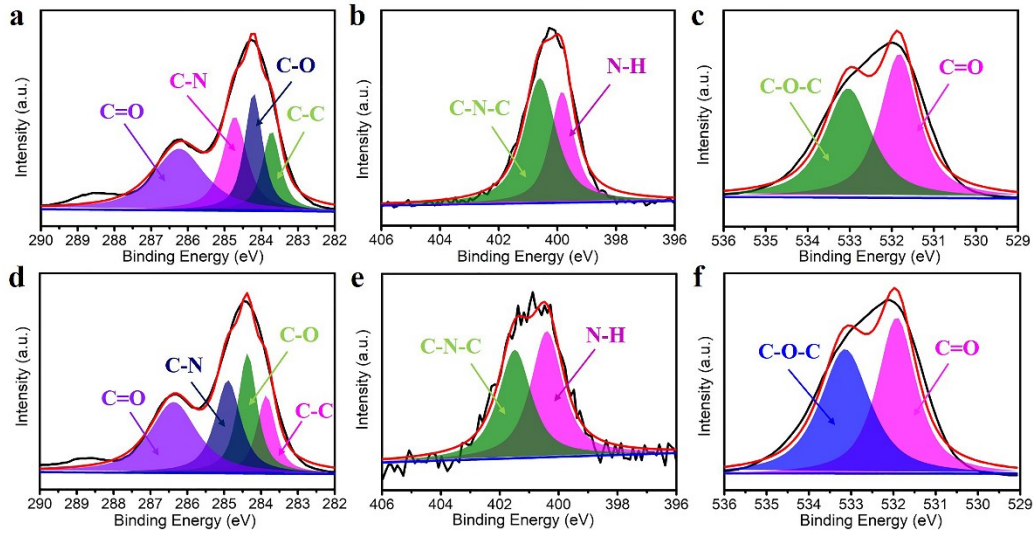

**Fig. S3** High-resolution spectra of the HA-PVA film (a) C1s, (b) N1s, (c) O1s, and high-resolution spectra of the SA-PVA film (d) C1s, (e) N1s, (f) O1s.

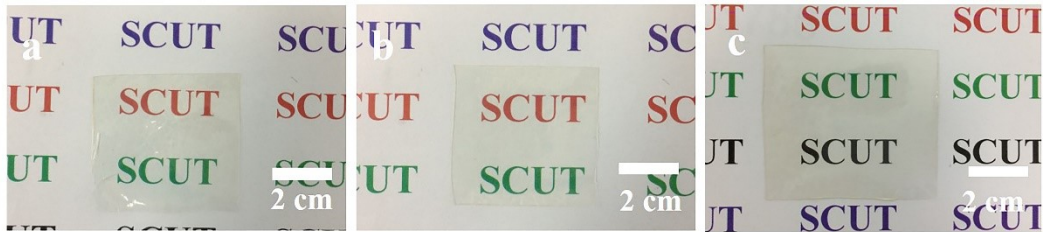

**Fig. S4** Photograph of (a) HA-PVA, (b) SA-PVA, and (c) PVAA film.

**Table S1** Elemental analysis of PVA, PVAA, and FA-PVA-0.8 film

| Sample | Element content (%) |       |      |
|--------|---------------------|-------|------|
|        | N                   | C     | H    |
| PVAA   | 0                   | 51.75 | 8.62 |
| HA-PVA | 0.33                | 49.49 | 9.69 |
| DA-PVA | 0.32                | 49.83 | 9.08 |
| SA-PVA | 0.52                | 48.74 | 9.44 |

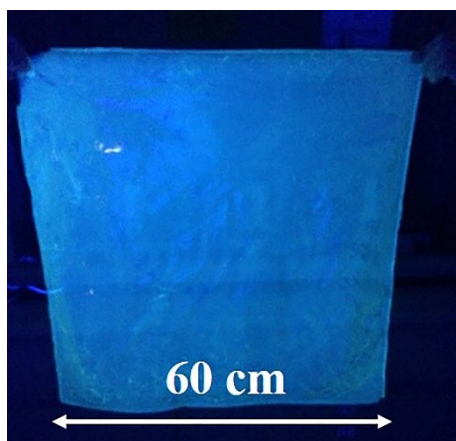

**Fig. S5.** Digital photos of DA-PVA film (60 cm $\times$ 60 cm) under 365 nm UV-light.

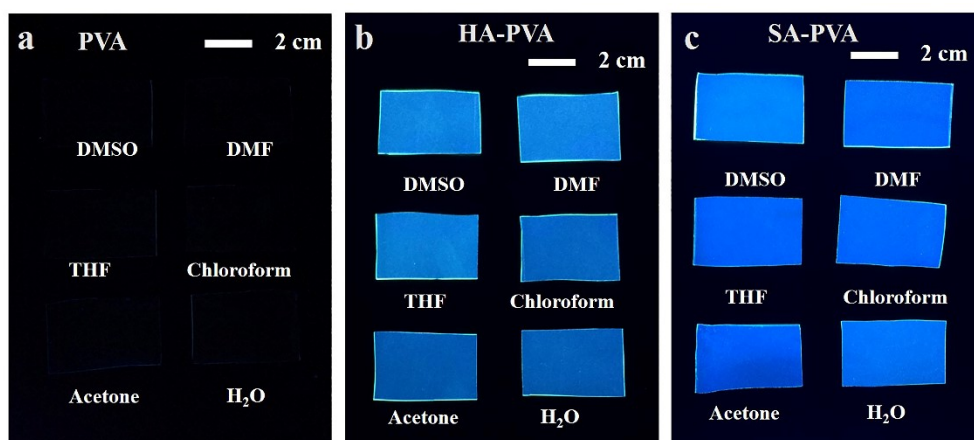

**Fig. S6** Digital photos of PVA (a), HA-PVA (b), and SA-PVA(c) film under 365 nm UV-light radiation after soaking in different solvents for 24 h.

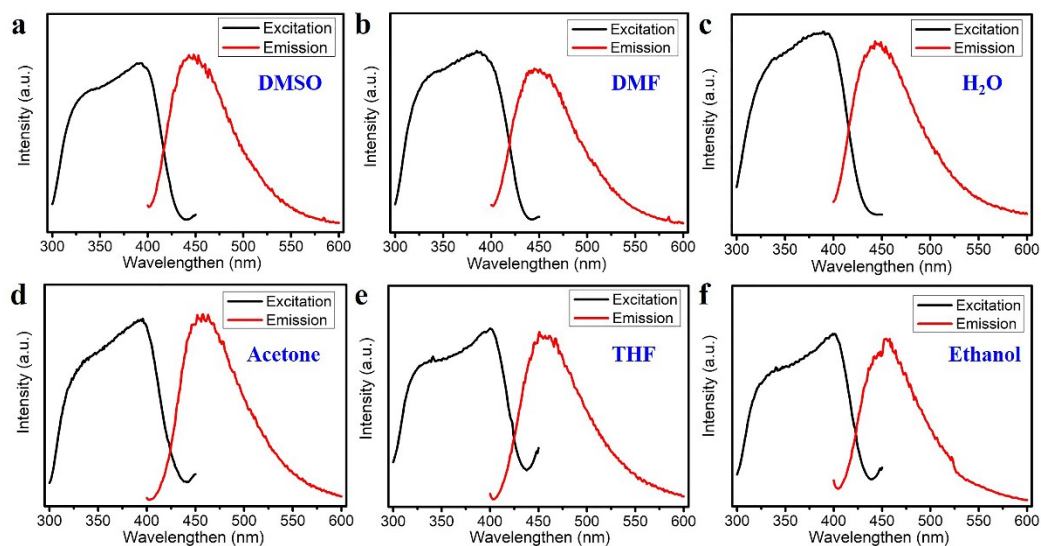

**Fig. S7** Fluorescence spectra of DA-PVA film with soaking in different solvents for 24 h.

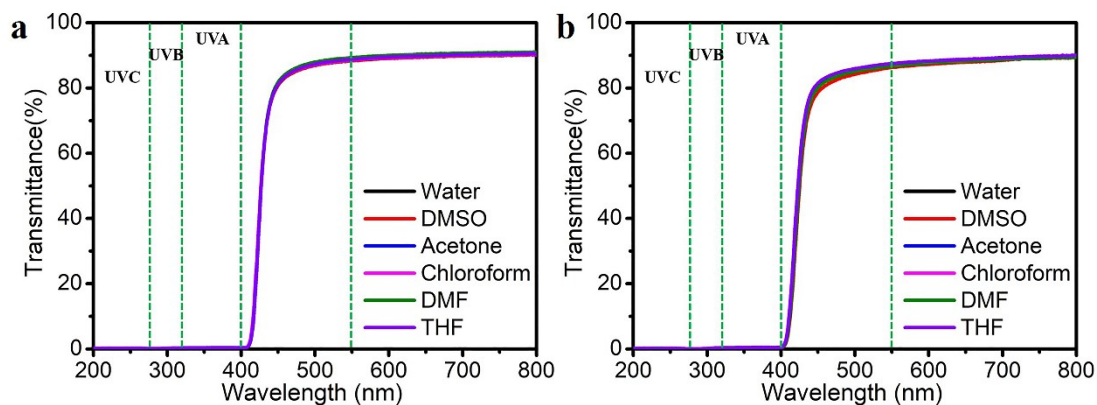

**Fig. S8** UV-vis transmittance curves of HA-PVA (a) and SA-PVA (b) film after soaking in different solvents for 24 h.

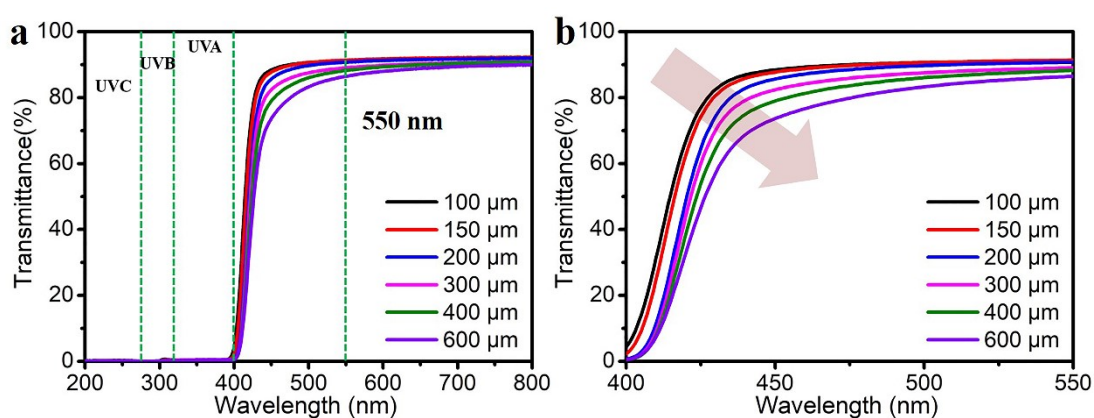

**Fig. S9** (a) UV-vis transmittance curves of DA-PVA fluorescent film with different thicknesses, (b) magnified images from 400 to 550 nm wavelengths.

**Table S2** The transparency and UV-blocking performance of DA-PVA film with different thicknesses.

| Samples                    | Thickness ( $\mu\text{m}$ ) |     |      |      |      |      |
|----------------------------|-----------------------------|-----|------|------|------|------|
|                            | 100                         | 150 | 200  | 300  | 400  | 600  |
| UV-blocking<br>at 400 nm   | 94%                         | 97% | 100% | 100% | 100% | 100% |
| Transmittance<br>at 550 nm | 91%                         | 91% | 90%  | 89%  | 88%  | 86%  |

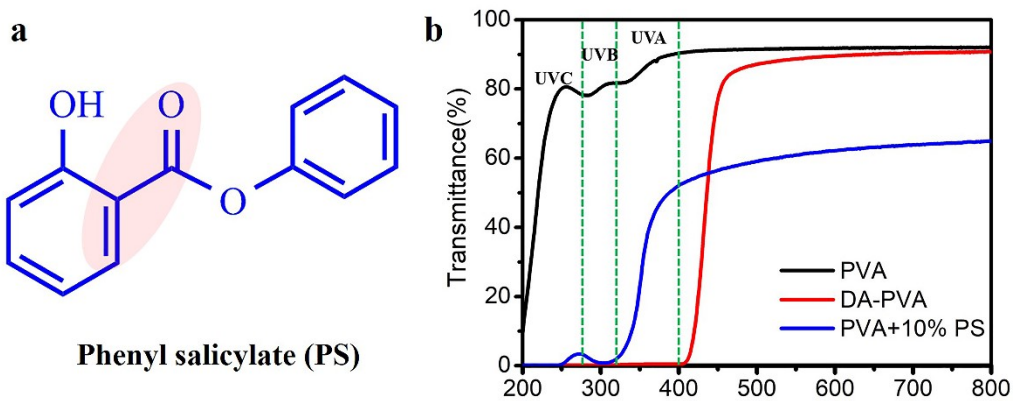

**Fig. S10** (a)The chemical structure of phenyl salicylate and (b) UV-vis transmittance curves of PVA, DA-PVA, and PVA/PS film.
